# Supplementary material for: Naphthalimide-Modified Tridentate Platinum(II) Complexes: Synthesis, Characterization, and Application in Singlet Oxygen Generation
Source: MDPI journal article supplement (doi:10.3390/inorganics11110438), 2023-11-17
Supplement: s1 [file s1]

Supporting Information for:

## **Naphthalimide-Modified Tridentate Platinum(II) Complexes: Synthesis, Characterization, and Application in Singlet Oxygen Generation**

**Zhong-Liang Gong<sup>1</sup>, Qing-Jun Pan<sup>1,2</sup>, Dian-Xue Ma<sup>1,2</sup> and Yu-Wu Zhong<sup>1,2,\*</sup>**

<sup>1</sup> Beijing National Laboratory for Molecular Sciences, CAS Key Laboratory of Photochemistry, CAS Research/Education Center for Excellence in Molecular Sciences, Institute of Chemistry, Chinese Academy of Sciences, Beijing 100190, China

<sup>2</sup> School of Chemical Sciences, University of Chinese Academy of Sciences, Beijing 100049, China

\* Correspondence: zhongyuwu@iccas.ac.cn

**Table S1.** Crystallographic data of **2**.

| Complex                      | <b>2</b>                                                         |
|------------------------------|------------------------------------------------------------------|
| CCDC No.                     | 2206904                                                          |
| empirical formula            | C <sub>42</sub> H <sub>41</sub> N <sub>3</sub> O <sub>2</sub> Pt |
| formula weight               | 814.87                                                           |
| space group                  | <i>P</i> $\bar{1}$                                               |
| crystal system               | Triclinic                                                        |
| <i>a</i> (Å)                 | 8.5185(2)                                                        |
| <i>b</i> (Å)                 | 14.6039(3)                                                       |
| <i>c</i> (Å)                 | 15.4058(3)                                                       |
| $\alpha$ (deg)               | 63.696(2)                                                        |
| $\beta$ (deg)                | 78.345(2)                                                        |
| $\gamma$ (deg)               | 82.054(2)                                                        |
| vol (Å <sup>3</sup> )        | 1680.07(7)                                                       |
| <i>Z</i>                     | 2                                                                |
| Density (Mg/m <sup>3</sup> ) | 1.611                                                            |
| temp (K)                     | 170.15                                                           |
| wavelength (Å)               | 1.54184                                                          |
| final R indices              | R <sub>1</sub> = 0.0300, wR <sub>2</sub> = 0.0833                |
| R indices (all data)         | R <sub>1</sub> = 0.0309, wR <sub>2</sub> = 0.0839                |

**Table S2.** Detailed lifetime data.

| Complex <sup>a</sup>        | Conditions                                                     | $\tau$ (μs) <sup>c</sup>                                                                                                               |
|-----------------------------|----------------------------------------------------------------|----------------------------------------------------------------------------------------------------------------------------------------|
| <b>1</b> (PF <sub>6</sub> ) | C <sub>2</sub> H <sub>4</sub> Cl <sub>2</sub> , Air            | $\tau_1 = 0.6$ (100%)                                                                                                                  |
|                             | C <sub>2</sub> H <sub>4</sub> Cl <sub>2</sub> , N <sub>2</sub> | $\tau_{ave} = 4.84$ ; $\tau_1 = 1.88$ , $\alpha_1 = 49\%$ ; $\tau_2 = 7.7$ , $\alpha_2 = 51\%$                                         |
|                             | CH <sub>3</sub> CN, Air                                        | $\tau_1 = 0.27$ (100%)                                                                                                                 |
|                             | CH <sub>3</sub> CN, N <sub>2</sub>                             | $\tau_1 = 3.21$ (100%)                                                                                                                 |
| <b>2</b>                    | C <sub>2</sub> H <sub>4</sub> Cl <sub>2</sub> , Air            | $\tau_{ave} = 0.72$ ; $\tau_1 = 0.47$ , $\alpha_1 = 85\%$ ; $\tau_2 = 2.13$ , $\alpha_2 = 15\%$                                        |
|                             | C <sub>2</sub> H <sub>4</sub> Cl <sub>2</sub> , N <sub>2</sub> | $\tau_{ave} = 7.0$ ; $\tau_1 = 5.08$ , $\alpha_1 = 86\%$ ; $\tau_2 = 18.6$ , $\alpha_2 = 14\%$                                         |
|                             | CH <sub>3</sub> CN, Air                                        | $\tau_1 = 0.24$ (100%)                                                                                                                 |
|                             | CH <sub>3</sub> CN, N <sub>2</sub>                             | $\tau_1 = 1.65$ (100%)                                                                                                                 |
| <b>NI</b>                   | C <sub>2</sub> H <sub>4</sub> Cl <sub>2</sub> , Air            | $\tau_{ave} = 3 \times 10^{-4}$ ; $\tau_1 = 2.4 \times 10^{-4}$ , $\alpha_1 = 98\%$ ; $\tau_2 = 2.9 \times 10^{-3}$ , $\alpha_2 = 2\%$ |

<sup>a</sup>Measured in specific solution of  $5 \times 10^{-5}$  M. <sup>c</sup>Monitored at 620 nm for **1**(PF<sub>6</sub>), 640 nm for **2** and 400 nm for **NI**, respectively, under specific conditions,  $\tau_{ave} = \alpha_1\tau_1 + \alpha_2\tau_2$ .

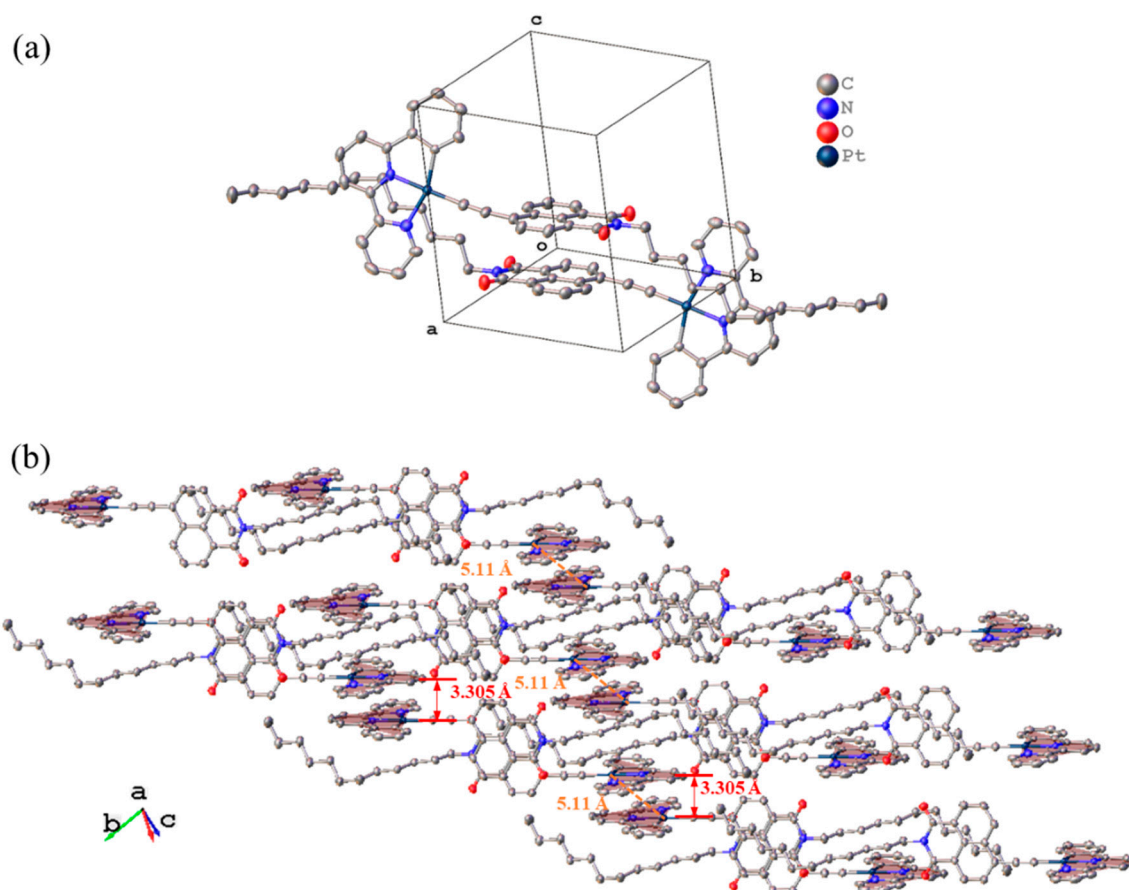

**Figure S1.** (a) Molecular dimer in one unit cell (b) the stacking model of **2** with thermal ellipsoid plot at 50% probability level.

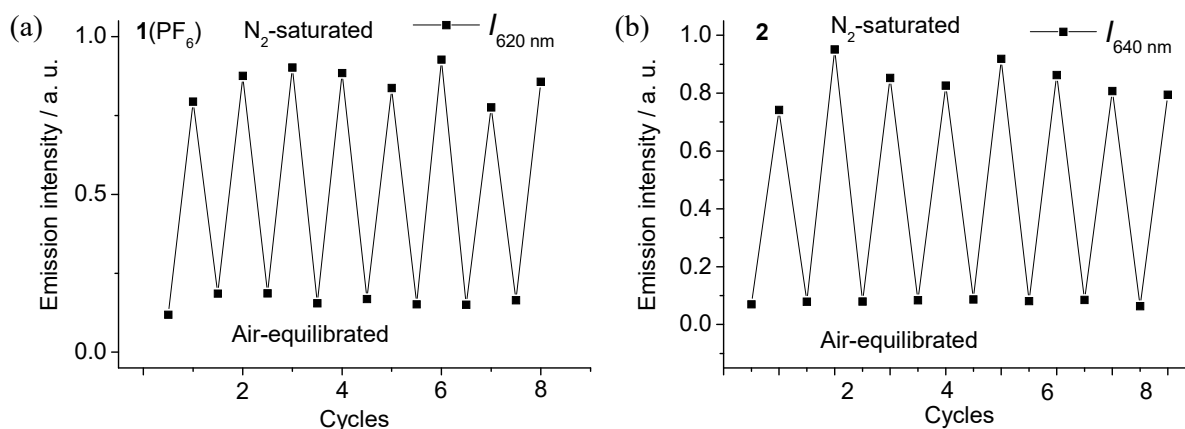

**Figure S2.** Response of emission intensity of (a) **1**(PF<sub>6</sub>) at 620 nm ( $I_{620\text{ nm}}$ ) and (b) **2** at 640 nm ( $I_{640\text{ nm}}$ ) upon repeated saturated with N<sub>2</sub> and air (containing about 21% O<sub>2</sub>) in DCE ( $5 \times 10^{-5}$  M). Excitation for **1**(PF<sub>6</sub>) and **2** are 450 and 435 nm, respectively.

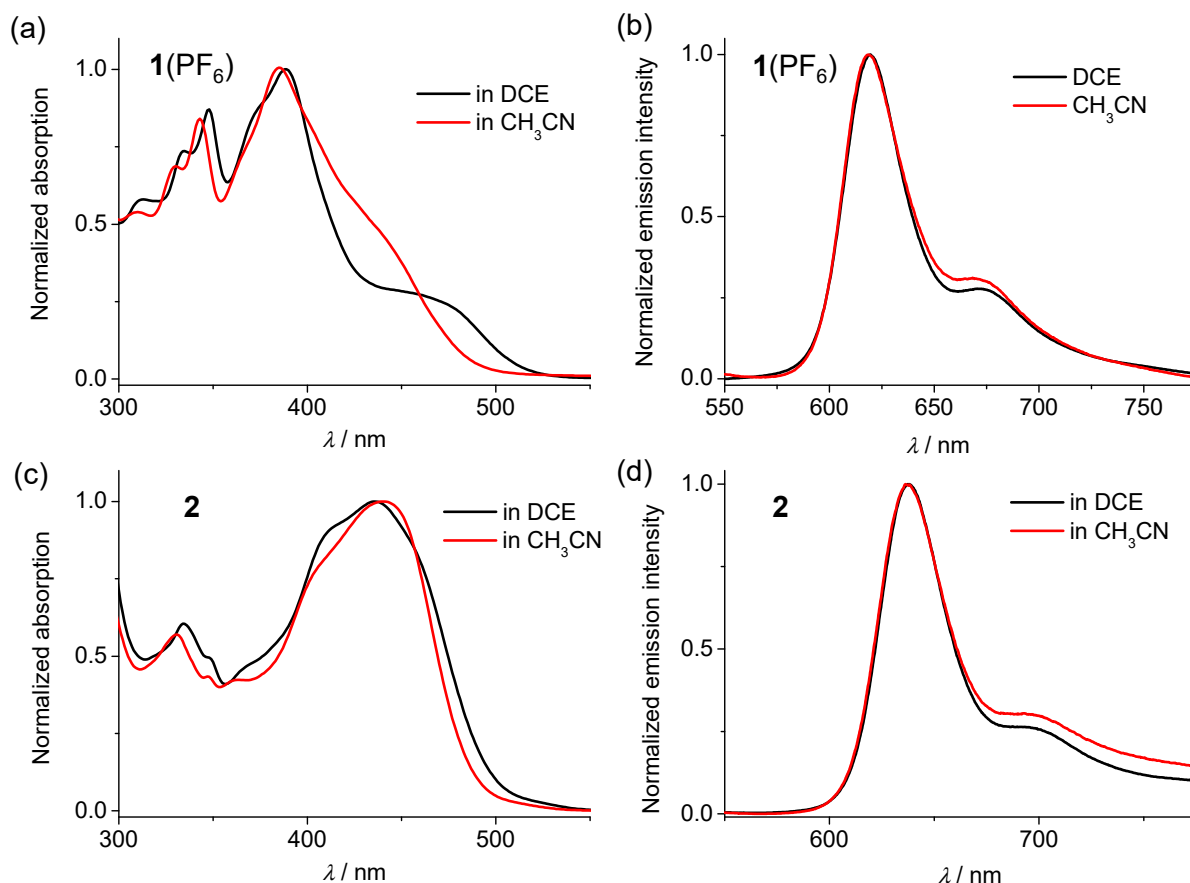

**Figure S3.** (a,c) Normalized UV-Vis absorption and (b,d) emission spectra of (a,b) **1(PF<sub>6</sub>)** and (c,d) **2** in solutions ( $5 \times 10^{-5}$  M) of DCE (black) and  $\text{CH}_3\text{CN}$  (red), respectively. Emission spectra were recorded by excitation at 450 nm for **1(PF<sub>6</sub>)** and 435 nm for **2** under  $\text{N}_2$ -saturated condition.

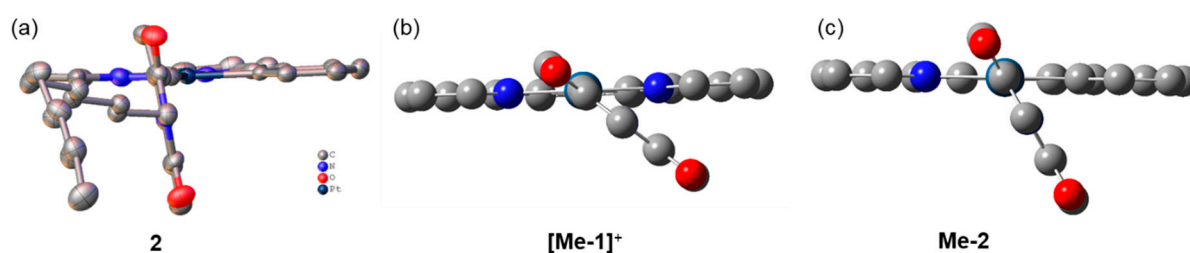

**Figure S4.** (a) Single crystal structure of **2**, (b,c) optimized structure of (b) **[Me-1]<sup>+</sup>** and (c) **Me-2** at ground state by DFT at the PBE1PBE/6-311G\*(for C,H,N,O)/SDD(for Pt) level using Gaussian 09.

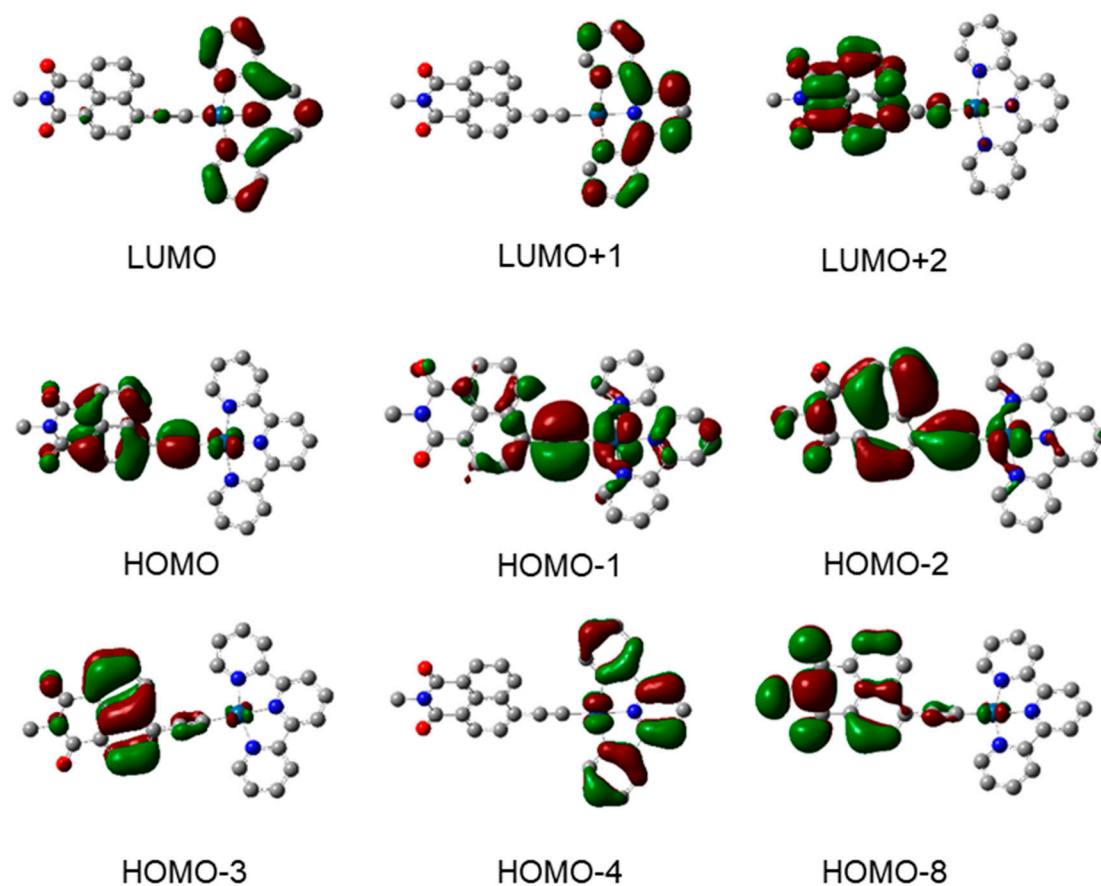

**Figure S5.** Isodensity plots of frontier molecular orbitals (MOs) of **[Me-1]<sup>+</sup>** computed based on the optimized ground state geometry (isovalue = 0.03).

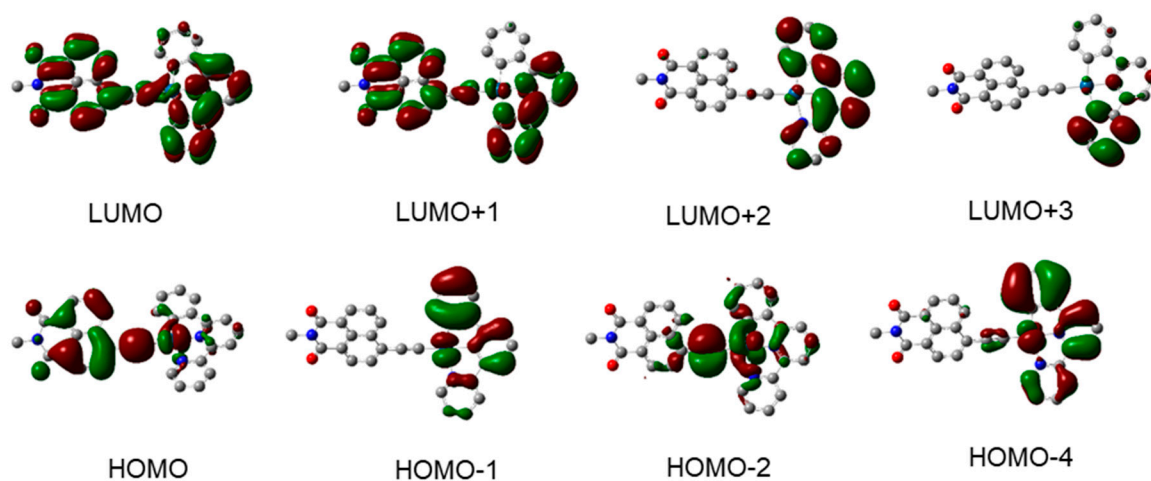

**Figure S6.** Isodensity plots of frontier molecular orbitals (MOs) of **Me-2** computed based on the optimized ground state geometry (isovalue = 0.03).

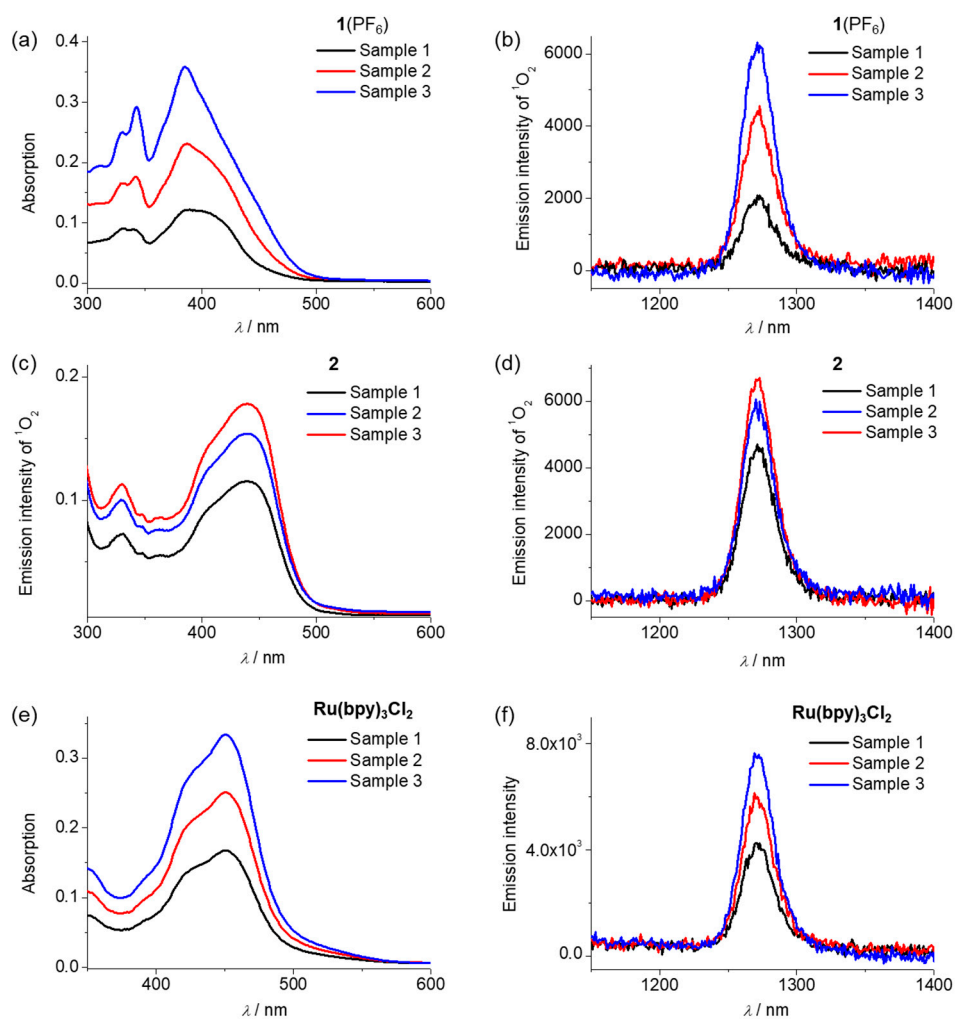

**Figure S7.** (a,c,e) Absorption and (b,d,f) NIR emission spectra of **1(PF<sub>6</sub>)**, **2** and **Ru(bpy)<sub>3</sub>Cl<sub>2</sub>** in aerated diluted  $\text{CH}_3\text{CN}$  with different concentration under excitation of 435 nm.

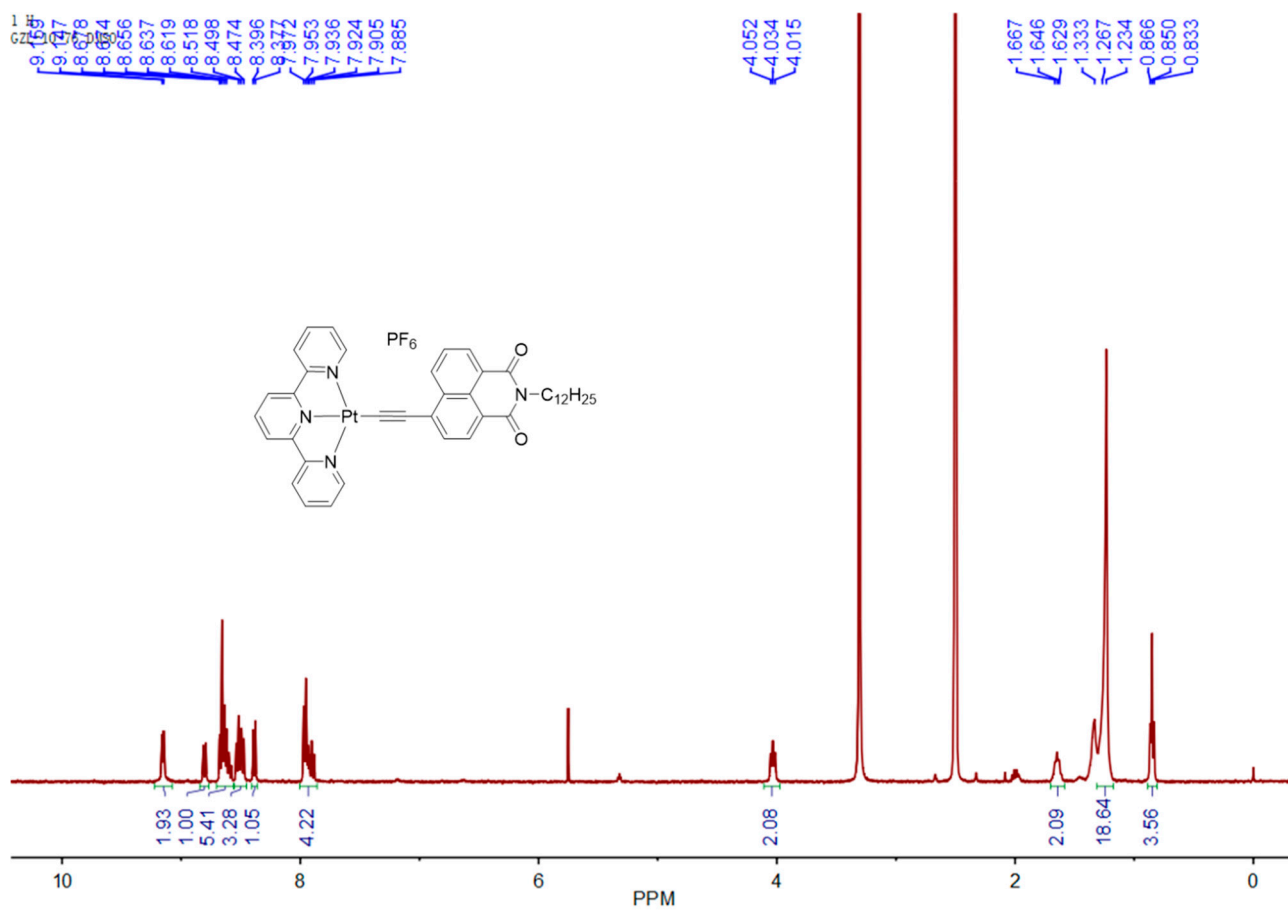

**Figure S8.**  $^1\text{H}$  NMR spectrum of **1**(PF<sub>6</sub>) in DMSO-*d*<sub>6</sub>.

**Acquisition Parameter**

|                       |            |                      |           |                       |                          |
|-----------------------|------------|----------------------|-----------|-----------------------|--------------------------|
| Acquisition Mode      | Single MS  | Acquired Scans       | 2         | Calibration Date      | Thu Jun 9 05:39:48 2022  |
| Polarity              | Positive   | No. of Cell Fills    | 1         | Data Acquisition Size | 2097152                  |
| Broadband Low Mass    | 202.1 m/z  | No. of Laser Shots   | 22        | Data Processing Size  | 4194304                  |
| Broadband High Mass   | 1600.0 m/z | Laser Power          | 36.6 lp   | Apodization           | Sine-Bell Multiplication |
| Source Accumulation   | 0.001 sec  | Laser Shot Frequency | 0.020 sec |                       |                          |
| Ion Accumulation Time | 0.050 sec  |                      |           |                       |                          |

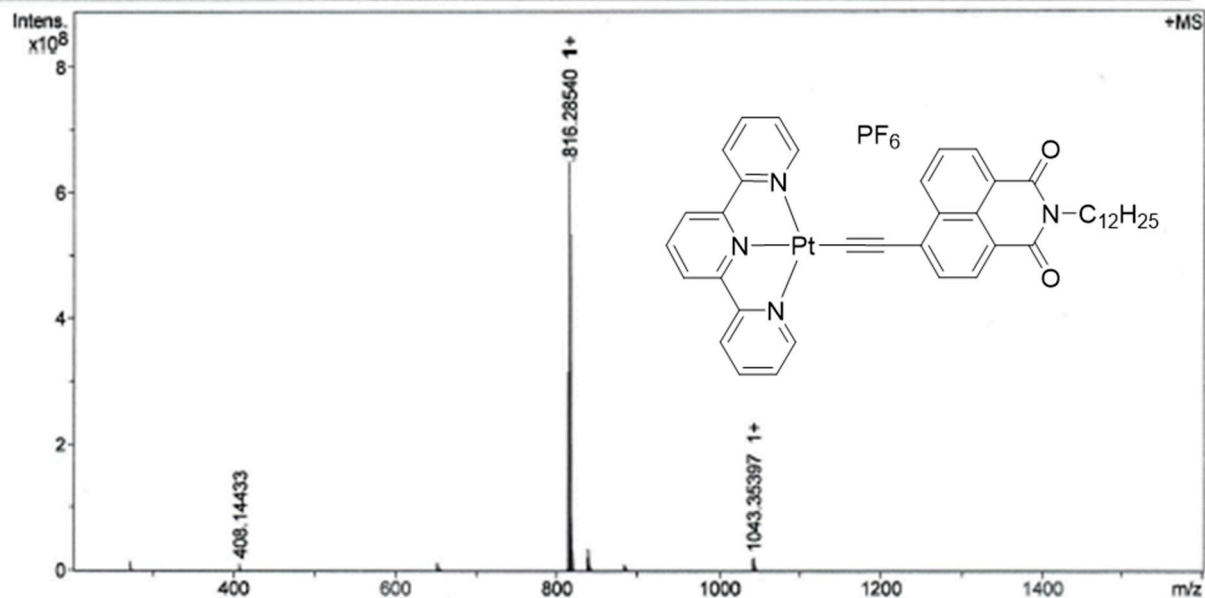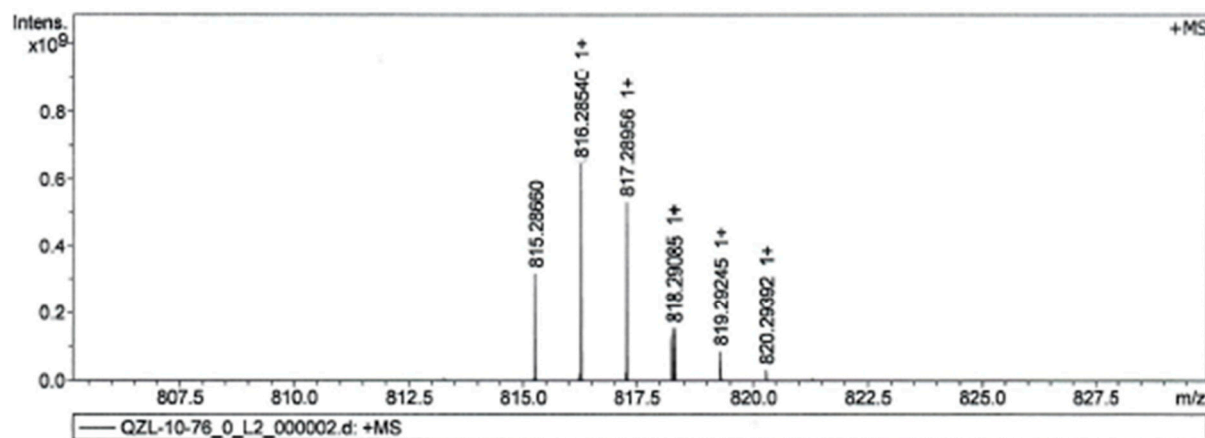

| Meas. m/z  | # | Ion Formula                                                      | Score  | m/z        | err [ppm] | Mean err [ppm] | mSigma | rdb  | e <sup>-</sup> Conf | N-Rule |
|------------|---|------------------------------------------------------------------|--------|------------|-----------|----------------|--------|------|---------------------|--------|
| 816.285401 | 1 | C <sub>41</sub> H <sub>41</sub> N <sub>4</sub> O <sub>2</sub> Pt | 100.00 | 816.287530 | 2.6       | 0.9            | 239.1  | 23.5 | even                | -      |

**Figure S9.** MALDI-TOF-HRMS of 1(PF<sub>6</sub>).



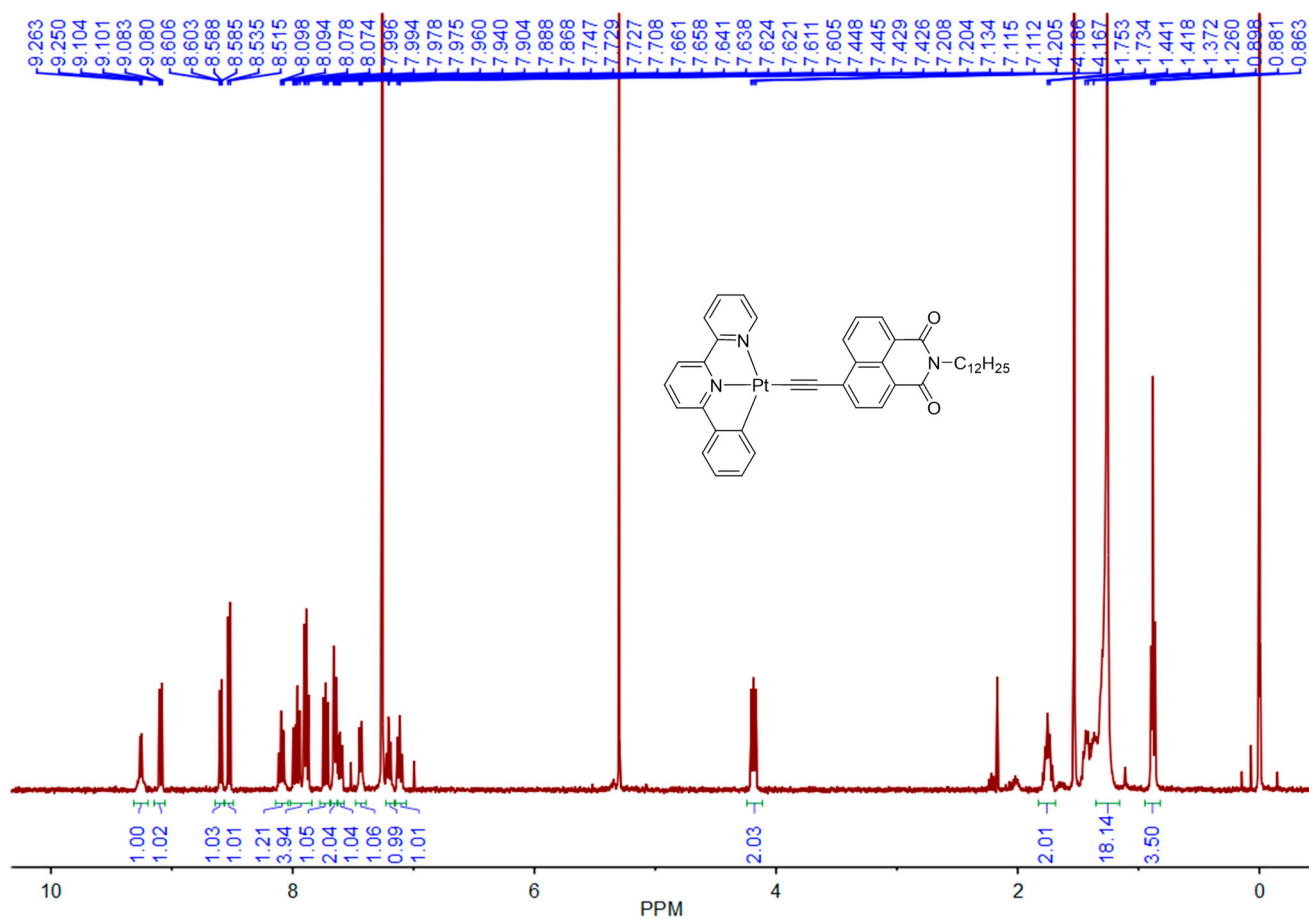

**Figure S10.** <sup>1</sup>H NMR spectrum of **2** in CDCl<sub>3</sub>.

# Acquisition Parameter

|                       |            |                      |           |                       |                          |
|-----------------------|------------|----------------------|-----------|-----------------------|--------------------------|
| Acquisition Mode      | Single MS  | Acquired Scans       | 3         | Calibration Date      | Thu Jun 9 05:39:48 2022  |
| Polarity              | Positive   | No. of Cell Fills    | 1         | Data Acquisition Size | 2097152                  |
| Broadband Low Mass    | 202.1 m/z  | No. of Laser Shots   | 17        | Data Processing Size  | 4194304                  |
| Broadband High Mass   | 1600.0 m/z | Laser Power          | 28.0 lp   | Apodization           | Sine-Bell Multiplication |
| Source Accumulation   | 0.001 sec  | Laser Shot Frequency | 0.020 sec |                       |                          |
| Ion Accumulation Time | 0.050 sec  |                      |           |                       |                          |

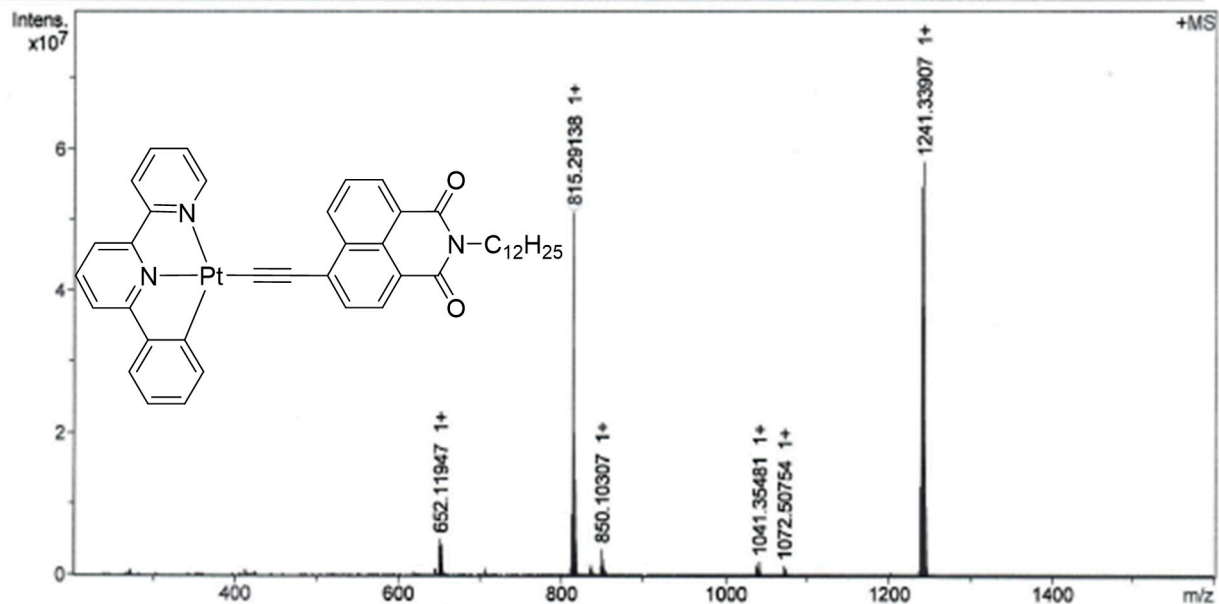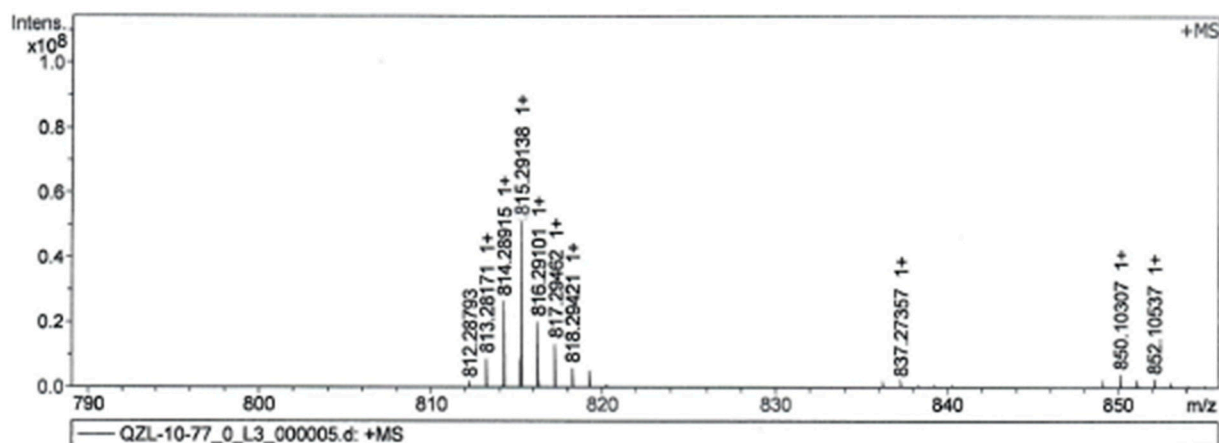

| Meas. m/z  | # | Ion Formula                                                      | Score  | m/z        | err [ppm] | Mean err [ppm] | mSigma | rdb  | e <sup>-</sup> Conf | N-Rule |
|------------|---|------------------------------------------------------------------|--------|------------|-----------|----------------|--------|------|---------------------|--------|
| 815.291385 | 1 | C <sub>42</sub> H <sub>42</sub> N <sub>3</sub> O <sub>2</sub> Pt | 100.00 | 815.292302 | -1.1      | 1.5            | 184.2  | 23.5 | even                | -      |

Figure S11. MAIDI-TOF-HRMS of 2.

## Data S1

Cartesian coordinates of DFT-optimized structure of singlet **[Me-1]<sup>+</sup>**:  
Charge = 1; multiplicity=1

|    |             |             |             |
|----|-------------|-------------|-------------|
| Pt | 2.07135500  | -0.10423100 | -0.11333500 |
| O  | -7.22844200 | -2.22287800 | -1.20400900 |
| O  | -7.85626600 | 1.60979500  | 1.13398200  |
| N  | 4.02387700  | 0.21001700  | 0.05758200  |
| N  | 2.70449100  | -2.01616200 | 0.20529200  |
| N  | -7.53582800 | -0.31257300 | -0.03624300 |
| C  | 4.46340600  | 1.47034300  | -0.05066800 |
| C  | 5.82266400  | 1.71991000  | 0.08197700  |
| H  | 6.21829300  | 2.72445700  | 0.00081500  |
| C  | 6.66931400  | 0.64326900  | 0.32423200  |
| H  | 7.73366800  | 0.81775600  | 0.43222400  |
| C  | 6.17565200  | -0.65274000 | 0.43179100  |
| H  | 6.84525300  | -1.48186700 | 0.62152100  |
| C  | 4.80853600  | -0.84996900 | 0.29011100  |
| C  | 3.38262600  | 2.43982500  | -0.30506100 |
| C  | 1.08154100  | 2.71973900  | -0.61500300 |
| H  | 0.11347000  | 2.23858200  | -0.66509900 |
| C  | 1.23684600  | 4.08600300  | -0.78875400 |
| H  | 0.36436100  | 4.69823600  | -0.98082300 |
| C  | 2.50731500  | 4.63187400  | -0.71427500 |
| H  | 2.66160300  | 5.69667800  | -0.84659600 |
| C  | 3.59123300  | 3.79770400  | -0.46917800 |
| H  | 4.59420700  | 4.20095600  | -0.40893200 |
| C  | 4.05873700  | -2.11713200 | 0.36714400  |
| C  | 4.64955700  | -3.34873800 | 0.58607400  |
| H  | 5.72262700  | -3.41948300 | 0.71277200  |
| C  | 3.85633700  | -4.48828200 | 0.64215500  |
| H  | 4.31121400  | -5.45731400 | 0.81320800  |
| C  | 2.48693100  | -4.36829000 | 0.47757900  |
| H  | 1.83141000  | -5.22965900 | 0.51388600  |
| C  | 1.94413900  | -3.11154000 | 0.25996200  |
| H  | 0.88151800  | -2.95864400 | 0.12373500  |
| C  | -8.97013800 | -0.53303100 | -0.13561500 |
| H  | -9.27390400 | -0.55618200 | -1.18293200 |
| H  | -9.47413100 | 0.28010900  | 0.37749700  |
| C  | -5.27098900 | -1.07135700 | -0.54495200 |
| C  | -4.74567000 | 0.05232600  | 0.12610100  |
| C  | -5.61552100 | 0.99514900  | 0.71580400  |
| C  | -5.10569800 | 2.09352700  | 1.37398100  |

|   |             |             |             |
|---|-------------|-------------|-------------|
| H | -5.79193500 | 2.80484400  | 1.81988500  |
| C | -3.71853100 | 2.28248000  | 1.46454700  |
| H | -3.32929200 | 3.14927800  | 1.98780700  |
| C | -2.85439300 | 1.37525400  | 0.89692600  |
| H | -1.78127900 | 1.51869400  | 0.97231100  |
| C | -3.34182500 | 0.24096000  | 0.21321800  |
| C | -2.47498200 | -0.72708500 | -0.39169600 |
| C | -3.03188300 | -1.82123700 | -1.04207000 |
| H | -2.37599900 | -2.55342400 | -1.49961100 |
| C | -4.41661000 | -1.99035500 | -1.11795700 |
| H | -4.83427100 | -2.85033600 | -1.62978800 |
| C | -6.72514100 | -1.27118200 | -0.63630400 |
| C | -7.07886900 | 0.81650700  | 0.63770100  |
| C | -1.06921500 | -0.56423000 | -0.32578700 |
| C | 0.13994000  | -0.39861100 | -0.25639900 |
| H | -9.23450300 | -1.48486800 | 0.32669300  |
| N | 2.12142800  | 1.91734100  | -0.37830700 |

Cartesian coordinates of DFT-optimized structure of triplet **[Me-1]<sup>+</sup>**:  
Charge = 1; multiplicity=3

|    |             |             |            |
|----|-------------|-------------|------------|
| Pt | 11.99450000 | -4.03250000 | 4.63570000 |
| O  | 9.15730000  | 4.45130000  | 1.32680000 |
| O  | 5.27360000  | 2.26050000  | 0.44860000 |
| N  | 12.63330000 | -5.59300000 | 5.71070000 |
| N  | 13.18340000 | -4.95450000 | 3.22630000 |
| N  | 7.23450000  | 3.34960000  | 0.84540000 |
| C  | 12.25850000 | -5.67640000 | 6.99110000 |
| C  | 12.75300000 | -6.70690000 | 7.78070000 |
| H  | 12.50230000 | -6.78450000 | 8.69340000 |
| C  | 13.61970000 | -7.61780000 | 7.20110000 |
| H  | 13.97090000 | -8.32540000 | 7.72890000 |
| C  | 13.98430000 | -7.51770000 | 5.87030000 |
| H  | 14.57310000 | -8.15520000 | 5.48160000 |
| C  | 13.47220000 | -6.46550000 | 5.10530000 |
| C  | 11.35940000 | -4.58380000 | 7.41390000 |
| C  | 10.21760000 | -2.63570000 | 6.75390000 |
| H  | 10.00280000 | -1.98880000 | 6.09180000 |
| C  | 9.66160000  | -2.51410000 | 8.02750000 |
| H  | 9.07550000  | -1.79350000 | 8.22580000 |
| C  | 9.96610000  | -3.44780000 | 8.99700000 |
| H  | 9.59400000  | -3.37640000 | 9.86880000 |
| C  | 10.82680000 | -4.49430000 | 8.68060000 |

|   |             |             |             |
|---|-------------|-------------|-------------|
| H | 11.04610000 | -5.14520000 | 9.33610000  |
| C | 13.76180000 | -6.12370000 | 3.70760000  |
| C | 14.59310000 | -6.88360000 | 2.90040000  |
| H | 14.96640000 | -7.69490000 | 3.22300000  |
| C | 14.87460000 | -6.44450000 | 1.61040000  |
| H | 15.45050000 | -6.95390000 | 1.05350000  |
| C | 14.32480000 | -5.27660000 | 1.13860000  |
| H | 14.53470000 | -4.97120000 | 0.26370000  |
| C | 13.45620000 | -4.53980000 | 1.94580000  |
| H | 13.05250000 | -3.74950000 | 1.60830000  |
| C | 6.62070000  | 4.62890000  | 0.45000000  |
| H | 6.93304771  | 5.39807469  | 1.12506237  |
| H | 5.55503291  | 4.53796101  | 0.48136497  |
| C | 9.19640000  | 2.10600000  | 1.64310000  |
| C | 8.42900000  | 0.91680000  | 1.64860000  |
| C | 7.07600000  | 0.93110000  | 1.23000000  |
| C | 6.33710000  | -0.23250000 | 1.23130000  |
| H | 5.42730000  | -0.22190000 | 0.95910000  |
| C | 6.94080000  | -1.43600000 | 1.64040000  |
| H | 6.43140000  | -2.23810000 | 1.63080000  |
| C | 8.23870000  | -1.47860000 | 2.04810000  |
| H | 8.62020000  | -2.30360000 | 2.32340000  |
| C | 9.02420000  | -0.30380000 | 2.06720000  |
| C | 10.39930000 | -0.30220000 | 2.49810000  |
| C | 11.12250000 | 0.87010000  | 2.40810000  |
| H | 12.04510000 | 0.86570000  | 2.63670000  |
| C | 10.52400000 | 2.06840000  | 1.98810000  |
| H | 11.04410000 | 2.86180000  | 1.94170000  |
| C | 8.56760000  | 3.38700000  | 1.26950000  |
| C | 6.43200000  | 2.19800000  | 0.81130000  |
| C | 10.97460000 | -1.49000000 | 3.06540000  |
| C | 11.37440000 | -2.46240000 | 3.62030000  |
| H | 6.92814675  | 4.87996513  | -0.54365124 |
| N | 11.05880000 | -3.65320000 | 6.43480000  |

Cartesian coordinates of DFT-optimized structure of singlet **Me-2**:

Charge = 0; multiplicity=1

|    |             |             |             |
|----|-------------|-------------|-------------|
| Pt | 2.05074800  | -0.05639200 | -0.14285300 |
| O  | -7.25182500 | -1.65369300 | -1.85035800 |
| O  | -7.86821200 | 1.14849700  | 1.65944700  |
| N  | 4.03971400  | 0.17138100  | 0.06658300  |
| N  | 2.69834400  | -2.06860300 | 0.22872500  |
| N  | -7.55026300 | -0.26053200 | -0.09600400 |

|   |             |             |             |
|---|-------------|-------------|-------------|
| C | 4.52529700  | 1.42143600  | -0.05610300 |
| C | 5.89799300  | 1.61766100  | 0.07974700  |
| H | 6.32474000  | 2.60852500  | -0.01466200 |
| C | 6.71051400  | 0.52291000  | 0.33724300  |
| H | 7.78050600  | 0.66334600  | 0.44564600  |
| C | 6.17226300  | -0.75465400 | 0.45908700  |
| H | 6.81417000  | -1.60257100 | 0.66010400  |
| C | 4.80002000  | -0.90562900 | 0.31500100  |
| C | 3.47823000  | 2.41416300  | -0.32330900 |
| C | 2.14326100  | 1.91690400  | -0.41215300 |
| C | 1.12815600  | 2.84041500  | -0.66108900 |
| H | 0.10149500  | 2.49625200  | -0.73520000 |
| C | 1.40793000  | 4.19682200  | -0.81788400 |
| H | 0.59620000  | 4.89258500  | -1.01149700 |
| C | 2.71466800  | 4.66620000  | -0.72930200 |
| H | 2.92793700  | 5.72318800  | -0.85240400 |
| C | 3.74913400  | 3.77349700  | -0.48161500 |
| H | 4.76832600  | 4.14190600  | -0.41120600 |
| C | 4.04063700  | -2.16975800 | 0.40767800  |
| C | 4.63248400  | -3.39916500 | 0.66050600  |
| H | 5.70306800  | -3.47345900 | 0.80469100  |
| C | 3.83817900  | -4.53574700 | 0.72967700  |
| H | 4.28981800  | -5.50171200 | 0.92706100  |
| C | 2.46950600  | -4.41842400 | 0.54449800  |
| H | 1.81347200  | -5.27939900 | 0.59015000  |
| C | 1.93858000  | -3.16213400 | 0.29594700  |
| H | 0.87657800  | -3.00976000 | 0.14331200  |
| C | -8.98444900 | -0.43378500 | -0.26057200 |
| H | -9.29654200 | -0.07353000 | -1.24203700 |
| H | -9.48552300 | 0.13426600  | 0.51718300  |
| C | -5.29021900 | -0.79535700 | -0.84510100 |
| C | -4.76178100 | 0.03222900  | 0.16752600  |
| C | -5.62850700 | 0.71662100  | 1.04732600  |
| C | -5.11526400 | 1.52879300  | 2.03658900  |
| H | -5.80008500 | 2.04452200  | 2.70068800  |
| C | -3.72860300 | 1.68225200  | 2.17667000  |
| H | -3.33586400 | 2.32499200  | 2.95726100  |
| C | -2.86719700 | 1.02279800  | 1.32994400  |
| H | -1.79366000 | 1.14069300  | 1.43783200  |
| C | -3.35729100 | 0.18295100  | 0.30785700  |
| C | -2.48745800 | -0.52177700 | -0.59091000 |
| C | -3.05102100 | -1.32799700 | -1.57575300 |
| H | -2.39668700 | -1.86028000 | -2.25712700 |
| C | -4.43448900 | -1.46050200 | -1.70093100 |

|   |             |             |             |
|---|-------------|-------------|-------------|
| H | -4.85375400 | -2.09336200 | -2.47564800 |
| C | -6.74149800 | -0.95417100 | -0.99347600 |
| C | -7.09106100 | 0.57290100  | 0.91983600  |
| C | -1.08498000 | -0.39337900 | -0.47323900 |
| C | 0.12665000  | -0.24978300 | -0.34906300 |
| H | -9.24487500 | -1.48951700 | -0.17727900 |

Cartesian coordinates of DFT-optimized structure of triplet **Me-2**:  
Charge = 0; multiplicity=3

|    |             |             |            |
|----|-------------|-------------|------------|
| Pt | 11.99450000 | -4.03250000 | 4.63570000 |
| O  | 9.15730000  | 4.45130000  | 1.32680000 |
| O  | 5.27360000  | 2.26050000  | 0.44860000 |
| N  | 12.63330000 | -5.59300000 | 5.71070000 |
| N  | 13.18340000 | -4.95450000 | 3.22630000 |
| N  | 7.23450000  | 3.34960000  | 0.84540000 |
| C  | 12.25850000 | -5.67640000 | 6.99110000 |
| C  | 12.75300000 | -6.70690000 | 7.78070000 |
| H  | 12.50230000 | -6.78450000 | 8.69340000 |
| C  | 13.61970000 | -7.61780000 | 7.20110000 |
| H  | 13.97090000 | -8.32540000 | 7.72890000 |
| C  | 13.98430000 | -7.51770000 | 5.87030000 |
| H  | 14.57310000 | -8.15520000 | 5.48160000 |
| C  | 13.47220000 | -6.46550000 | 5.10530000 |
| C  | 11.35940000 | -4.58380000 | 7.41390000 |
| C  | 11.05880000 | -3.65320000 | 6.43480000 |
| C  | 10.21760000 | -2.63570000 | 6.75390000 |
| H  | 10.00280000 | -1.98880000 | 6.09180000 |
| C  | 9.66160000  | -2.51410000 | 8.02750000 |
| H  | 9.07550000  | -1.79350000 | 8.22580000 |
| C  | 9.96610000  | -3.44780000 | 8.99700000 |
| H  | 9.59400000  | -3.37640000 | 9.86880000 |
| C  | 10.82680000 | -4.49430000 | 8.68060000 |
| H  | 11.04610000 | -5.14520000 | 9.33610000 |
| C  | 13.76180000 | -6.12370000 | 3.70760000 |
| C  | 14.59310000 | -6.88360000 | 2.90040000 |
| H  | 14.96640000 | -7.69490000 | 3.22300000 |
| C  | 14.87460000 | -6.44450000 | 1.61040000 |
| H  | 15.45050000 | -6.95390000 | 1.05350000 |
| C  | 14.32480000 | -5.27660000 | 1.13860000 |
| H  | 14.53470000 | -4.97120000 | 0.26370000 |
| C  | 13.45620000 | -4.53980000 | 1.94580000 |

|   |             |             |             |
|---|-------------|-------------|-------------|
| H | 13.05250000 | -3.74950000 | 1.60830000  |
| C | 6.62070000  | 4.62890000  | 0.45000000  |
| H | 6.93304771  | 5.39807469  | 1.12506237  |
| H | 5.55503291  | 4.53796101  | 0.48136497  |
| C | 9.19640000  | 2.10600000  | 1.64310000  |
| C | 8.42900000  | 0.91680000  | 1.64860000  |
| C | 7.07600000  | 0.93110000  | 1.23000000  |
| C | 6.33710000  | -0.23250000 | 1.23130000  |
| H | 5.42730000  | -0.22190000 | 0.95910000  |
| C | 6.94080000  | -1.43600000 | 1.64040000  |
| H | 6.43140000  | -2.23810000 | 1.63080000  |
| C | 8.23870000  | -1.47860000 | 2.04810000  |
| H | 8.62020000  | -2.30360000 | 2.32340000  |
| C | 9.02420000  | -0.30380000 | 2.06720000  |
| C | 10.39930000 | -0.30220000 | 2.49810000  |
| C | 11.12250000 | 0.87010000  | 2.40810000  |
| H | 12.04510000 | 0.86570000  | 2.63670000  |
| C | 10.52400000 | 2.06840000  | 1.98810000  |
| H | 11.04410000 | 2.86180000  | 1.94170000  |
| C | 8.56760000  | 3.38700000  | 1.26950000  |
| C | 6.43200000  | 2.19800000  | 0.81130000  |
| C | 10.97460000 | -1.49000000 | 3.06540000  |
| C | 11.37440000 | -2.46240000 | 3.62030000  |
| H | 6.92814675  | 4.87996513  | -0.54365124 |
